# Supplementary material for: Electrostatic modulation of multiple binding events between loquacious-PD and double-stranded RNA
Source: Royal Society of Chemistry journal article supplement (doi:10.1039/d4cp02151g), 2024-01-01
Supplement: d4cp02151g2.zip [file d4cp02151g2.zip]

## Sheet: lDDT scores
Residue	Local Distance Difference Test (lDDT) score
1	0.35
2	0.34
3	0.33
4	0.33
5	0.33
6	0.32
7	0.33
8	0.35
9	0.36
10	0.39
11	0.41
12	0.41
13	0.44
14	0.45
15	0.44
16	0.44
17	0.44
18	0.45
19	0.43
20	0.44
21	0.43
22	0.42
23	0.42
24	0.42
25	0.43
26	0.43
27	0.43
28	0.43
29	0.44
30	0.43
31	0.43
32	0.42
33	0.43
34	0.43
35	0.44
36	0.46
37	0.46
38	0.48
39	0.48
40	0.48
41	0.48
42	0.49
43	0.48
44	0.47
45	0.48
46	0.48
47	0.48
48	0.47
49	0.49
50	0.5
51	0.49
52	0.48
53	0.48
54	0.48
55	0.47
56	0.47
57	0.45
58	0.43
59	0.41
60	0.43
61	0.45
62	0.47
63	0.49
64	0.5
65	0.51
66	0.53
67	0.56
68	0.58
69	0.6
70	0.62
71	0.61
72	0.63
73	0.63
74	0.6
75	0.6
76	0.61
77	0.59
78	0.58
79	0.58
80	0.58
81	0.56
82	0.54
83	0.53
84	0.53
85	0.52
86	0.53
87	0.53
88	0.53
89	0.53
90	0.52
91	0.53
92	0.55
93	0.57
94	0.59
95	0.58
96	0.58
97	0.56
98	0.53
99	0.52
100	0.51
101	0.5
102	0.49
103	0.51
104	0.51
105	0.52
106	0.51
107	0.5
108	0.5
109	0.5
110	0.51
111	0.52
112	0.53
113	0.55
114	0.58
115	0.62
116	0.62
117	0.64
118	0.63
119	0.61
120	0.62
121	0.63
122	0.62
123	0.6
124	0.61
125	0.62
126	0.58
127	0.57
128	0.59
129	0.58
130	0.61
131	0.64
132	0.64
133	0.64
134	0.68
135	0.7
136	0.72
137	0.74
138	0.73
139	0.73
140	0.73
141	0.73
142	0.71
143	0.71
144	0.71
145	0.7
146	0.69
147	0.7
148	0.71
149	0.71
150	0.73
151	0.74
152	0.77
153	0.77
154	0.79
155	0.8
156	0.79
157	0.81
158	0.8
159	0.77
160	0.74
161	0.72
162	0.72
163	0.73
164	0.76
165	0.82
166	0.82
167	0.82
168	0.81
169	0.81
170	0.79
171	0.76
172	0.74
173	0.69
174	0.64
175	0.59
176	0.58
177	0.61
178	0.68
179	0.75
180	0.79
181	0.81
182	0.81
183	0.82
184	0.8
185	0.81
186	0.78
187	0.76
188	0.76
189	0.79
190	0.76
191	0.76
192	0.8
193	0.81
194	0.77
195	0.79
196	0.81
197	0.79
198	0.77
199	0.78
200	0.78
201	0.74
202	0.73
203	0.72
204	0.69
205	0.66
206	0.65
207	0.64
208	0.65
209	0.65
210	0.64
211	0.63
212	0.59
213	0.56
214	0.57
215	0.53
216	0.52
217	0.5
218	0.49
219	0.49
220	0.48
221	0.47
222	0.47
223	0.47
224	0.45
225	0.44
226	0.41
227	0.38
228	0.37
229	0.4
230	0.42
231	0.47
232	0.49
233	0.51
234	0.52
235	0.52
236	0.54
237	0.56
238	0.6
239	0.64
240	0.67
241	0.69
242	0.72
243	0.76
244	0.77
245	0.77
246	0.76
247	0.78
248	0.78
249	0.8
250	0.82
251	0.82
252	0.81
253	0.82
254	0.81
255	0.79
256	0.79
257	0.78
258	0.75
259	0.74
260	0.72
261	0.7
262	0.68
263	0.68
264	0.69
265	0.71
266	0.76
267	0.79
268	0.8
269	0.81
270	0.82
271	0.82
272	0.82
273	0.83
274	0.82
275	0.79
276	0.76
277	0.74
278	0.71
279	0.72
280	0.76
281	0.82
282	0.83
283	0.84
284	0.82
285	0.82
286	0.81
287	0.8
288	0.76
289	0.72
290	0.66
291	0.67
292	0.72
293	0.78
294	0.81
295	0.83
296	0.82
297	0.82
298	0.81
299	0.81
300	0.82
301	0.83
302	0.84
303	0.84
304	0.85
305	0.86
306	0.86
307	0.85
308	0.84
309	0.83
310	0.83
311	0.83
312	0.81
313	0.8
314	0.8
315	0.77
316	0.74
317	0.73
318	0.73
319	0.69
320	0.67
321	0.64
322	0.61
323	0.59
324	0.61
325	0.64
326	0.64
327	0.67
328	0.7
329	0.68
330	0.67
331	0.7
332	0.69
333	0.66
334	0.68
335	0.72
336	0.71
337	0.72
338	0.74
339	0.73
340	0.72
341	0.7
342	0.67
343	0.68
344	0.67
345	0.63
346	0.62
347	0.59
348	0.59
349	0.58
350	0.57
351	0.51
352	0.52
353	0.53
354	0.54
355	0.52
356	0.47
357	0.43
358	0.43
359	0.45

## Sheet: RMSD equilibration
Frame	Time (ns)	RMSD (Angstrom)
0	0	0
1	0.01	1.75468
2	0.02	2.20598
3	0.03	2.72039
4	0.04	3.11902
5	0.05	3.44753
6	0.06	3.50535
7	0.07	3.58832
8	0.08	4.07684
9	0.09	4.07197
10	0.1	4.38344
11	0.11	4.42432
12	0.12	4.67401
13	0.13	4.9074
14	0.14	5.18857
15	0.15	5.13309
16	0.16	5.37017
17	0.17	5.52738
18	0.18	5.5011
19	0.19	5.76167
20	0.2	6.01451
21	0.21	6.2479
22	0.22	6.14784
23	0.23	6.58171
24	0.24	6.43811
25	0.25	6.51218
26	0.26	6.30508
27	0.27	6.11651
28	0.28	6.26274
29	0.29	6.24547
30	0.3	6.33628
31	0.31	6.12452
32	0.32	5.9482
33	0.33	5.90709
34	0.34	5.97254
35	0.35	6.65438
36	0.36	7.00158
37	0.37	6.97024
38	0.38	7.07236
39	0.39	7.16581
40	0.4	7.47329
41	0.41	7.85694
42	0.42	8.05237
43	0.43	7.89132
44	0.44	8.24218
45	0.45	7.84068
46	0.46	7.50858
47	0.47	7.59134
48	0.48	7.75147
49	0.49	7.78759
50	0.5	7.50219
51	0.51	7.45703
52	0.52	7.62611
53	0.53	7.56384
54	0.54	7.67879
55	0.55	7.65151
56	0.56	7.67936
57	0.57	7.58023
58	0.58	7.88508
59	0.59	8.15514
60	0.6	8.5892
61	0.61	8.25417
62	0.62	8.35579
63	0.63	8.7071
64	0.64	8.79361
65	0.65	9.01487
66	0.66	8.85534
67	0.67	8.87429
68	0.68	8.9668
69	0.69	8.88249
70	0.7	8.84578
71	0.71	8.78286
72	0.72	8.91602
73	0.73	8.74824
74	0.74	8.66422
75	0.75	8.88178
76	0.76	8.70153
77	0.77	8.71184
78	0.78	8.617
79	0.79	9.19636
80	0.8	9.56756
81	0.81	9.49607
82	0.82	9.46529
83	0.83	9.32203
84	0.84	9.06099
85	0.85	9.06761
86	0.86	9.2611
87	0.87	9.3487
88	0.88	9.34324
89	0.89	9.24137
90	0.9	9.18261
91	0.91	9.39435
92	0.92	9.35658
93	0.93	9.34651
94	0.94	9.25446
95	0.95	9.30108
96	0.96	9.37314
97	0.97	9.44794
98	0.98	9.59909
99	0.99	9.75095
100	1	9.64587
101	1.01	9.48483
102	1.02	9.49627
103	1.03	9.68656
104	1.04	9.62717
105	1.05	9.97447
106	1.06	9.78477
107	1.07	9.73726
108	1.08	9.76814
109	1.09	9.91097
110	1.1	10.0201
111	1.11	10.188
112	1.12	10.1916
113	1.13	10.1875
114	1.14	9.93584
115	1.15	9.91755
116	1.16	10.0427
117	1.17	10.04
118	1.18	10.4583
119	1.19	10.3092
120	1.2	10.0019
121	1.21	10.1452
122	1.22	9.85503
123	1.23	9.7919
124	1.24	9.84077
125	1.25	9.96967
126	1.26	10.0097
127	1.27	9.69784
128	1.28	9.49611
129	1.29	9.80846
130	1.3	10.1839
131	1.31	9.97107
132	1.32	9.6037
133	1.33	9.63244
134	1.34	9.5054
135	1.35	9.47933
136	1.36	9.63991
137	1.37	9.63652
138	1.38	9.75374
139	1.39	9.5737
140	1.4	9.90165
141	1.41	9.87724
142	1.42	9.85962
143	1.43	9.67204
144	1.44	9.41654
145	1.45	9.4732
146	1.46	9.40098
147	1.47	9.56901
148	1.48	9.31029
149	1.49	9.30941
150	1.5	9.54888
151	1.51	9.1472
152	1.52	8.87012
153	1.53	9.01497
154	1.54	8.77589
155	1.55	8.67868
156	1.56	8.93733
157	1.57	9.34733
158	1.58	9.33129
159	1.59	9.32148
160	1.6	9.56459
161	1.61	9.66411
162	1.62	9.78412
163	1.63	10.0507
164	1.64	9.85922
165	1.65	9.89461
166	1.66	9.95979
167	1.67	10.0495
168	1.68	10.2335
169	1.69	9.99352
170	1.7	10.2224
171	1.71	10.326
172	1.72	10.0583
173	1.73	9.82333
174	1.74	9.63565
175	1.75	9.83009
176	1.76	10.1337
177	1.77	10.4628
178	1.78	10.6313
179	1.79	10.5818
180	1.8	10.5695
181	1.81	10.6323
182	1.82	10.7555
183	1.83	10.8664
184	1.84	11.0392
185	1.85	10.5937
186	1.86	10.6849
187	1.87	10.9841
188	1.88	10.9473
189	1.89	11.2645
190	1.9	11.2803
191	1.91	11.204
192	1.92	11.266
193	1.93	11.1171
194	1.94	11.241
195	1.95	10.8773
196	1.96	10.6817
197	1.97	10.7559
198	1.98	10.7523
199	1.99	10.8675
200	2	11.0221
201	2.01	11.1735
202	2.02	11.2229
203	2.03	11.5613
204	2.04	11.796
205	2.05	11.8875
206	2.06	11.8447
207	2.07	12.1022
208	2.08	12.1815
209	2.09	12.1715
210	2.1	12.3574
211	2.11	12.5251
212	2.12	12.3947
213	2.13	12.2467
214	2.14	12.3145
215	2.15	11.7917
216	2.16	12.0541
217	2.17	12.0119
218	2.18	11.989
219	2.19	11.6833
220	2.2	11.8083
221	2.21	11.6077
222	2.22	12.003
223	2.23	12.0633
224	2.24	12.1976
225	2.25	12.4173
226	2.26	12.3209
227	2.27	11.994
228	2.28	12.0961
229	2.29	12.3006
230	2.3	12.5952
231	2.31	12.77
232	2.32	12.7136
233	2.33	12.5782
234	2.34	12.4352
235	2.35	12.1182
236	2.36	11.7722
237	2.37	11.6097
238	2.38	11.4631
239	2.39	11.1077
240	2.4	11.2309
241	2.41	11.428
242	2.42	11.194
243	2.43	11.3836
244	2.44	11.8544
245	2.45	11.7192
246	2.46	12.0551
247	2.47	11.9013
248	2.48	11.9439
249	2.49	12.0434
250	2.5	11.911
251	2.51	11.7687
252	2.52	11.905
253	2.53	11.8869
254	2.54	11.8977
255	2.55	11.9444
256	2.56	12.0399
257	2.57	12.0659
258	2.58	12.178
259	2.59	12.0727
260	2.6	12.0092
261	2.61	12.2347
262	2.62	12.3645
263	2.63	12.2079
264	2.64	12.5738
265	2.65	12.5665
266	2.66	12.7723
267	2.67	12.5492
268	2.68	12.8023
269	2.69	12.972
270	2.7	12.715
271	2.71	12.8573
272	2.72	12.6817
273	2.73	12.524
274	2.74	12.5364
275	2.75	12.6843
276	2.76	12.4773
277	2.77	12.4774
278	2.78	12.2467
279	2.79	12.034
280	2.8	12.0455
281	2.81	11.8756
282	2.82	12.033
283	2.83	12.4388
284	2.84	12.6345
285	2.85	12.8738
286	2.86	12.6725
287	2.87	12.4772
288	2.88	12.6147
289	2.89	12.86
290	2.9	13.561
291	2.91	13.2317
292	2.92	13.4983
293	2.93	13.4483
294	2.94	13.507
295	2.95	13.4235
296	2.96	13.9033
297	2.97	13.7758
298	2.98	13.8768
299	2.99	13.6156
300	3	13.8858
301	3.01	13.8545
302	3.02	13.8674
303	3.03	14.0589
304	3.04	14.1915
305	3.05	13.9068
306	3.06	14.1702
307	3.07	13.9563
308	3.08	13.9366
309	3.09	13.8343
310	3.1	14.071
311	3.11	14.2839
312	3.12	14.0938
313	3.13	14.1447
314	3.14	13.6292
315	3.15	13.3291
316	3.16	13.2518
317	3.17	13.325
318	3.18	13.465
319	3.19	13.2744
320	3.2	13.1998
321	3.21	13.0573
322	3.22	12.8376
323	3.23	12.7115
324	3.24	12.6295
325	3.25	12.4319
326	3.26	12.5791
327	3.27	12.7296
328	3.28	12.5796
329	3.29	12.6142
330	3.3	12.23
331	3.31	12.2264
332	3.32	11.9251
333	3.33	12.0789
334	3.34	11.6319
335	3.35	11.7131
336	3.36	11.5009
337	3.37	11.6685
338	3.38	11.5557
339	3.39	11.5057
340	3.4	11.5673
341	3.41	11.7523
342	3.42	11.4921
343	3.43	11.0333
344	3.44	11.3845
345	3.45	11.227
346	3.46	10.9987
347	3.47	11.2482
348	3.48	11.2693
349	3.49	11.4709
350	3.5	11.3571
351	3.51	11.382
352	3.52	11.4999
353	3.53	11.3073
354	3.54	10.6109
355	3.55	10.6223
356	3.56	10.9908
357	3.57	11.1948
358	3.58	10.8472
359	3.59	10.8917
360	3.6	10.7774
361	3.61	10.8479
362	3.62	10.9382
363	3.63	11.3711
364	3.64	11.6382
365	3.65	11.4297
366	3.66	11.6175
367	3.67	11.5165
368	3.68	11.4335
369	3.69	12.23
370	3.7	12.5026
371	3.71	12.2688
372	3.72	12.0395
373	3.73	11.9649
374	3.74	11.773
375	3.75	12.0632
376	3.76	12.1813
377	3.77	12.198
378	3.78	12.1311
379	3.79	12.4011
380	3.8	12.4533
381	3.81	12.9443
382	3.82	12.6977
383	3.83	12.5353
384	3.84	12.5063
385	3.85	12.3315
386	3.86	12.4415
387	3.87	12.7593
388	3.88	12.8388
389	3.89	12.8218
390	3.9	12.7138
391	3.91	12.7784
392	3.92	12.5612
393	3.93	12.4307
394	3.94	12.685
395	3.95	12.8101
396	3.96	12.7799
397	3.97	12.9117
398	3.98	12.5438
399	3.99	12.677
400	4	13.104
401	4.01	13.2741
402	4.02	13.1014
403	4.03	13.1193
404	4.04	12.7795
405	4.05	12.797
406	4.06	12.8632
407	4.07	12.859
408	4.08	13.0302
409	4.09	13.1322
410	4.1	13.0392
411	4.11	13.4778
412	4.12	13.7793
413	4.13	13.9226
414	4.14	13.9652
415	4.15	13.7791
416	4.16	13.509
417	4.17	13.1333
418	4.18	13.3865
419	4.19	13.3734
420	4.2	13.5361
421	4.21	13.2489
422	4.22	13.2454
423	4.23	13.1951
424	4.24	13.2863
425	4.25	13.4075
426	4.26	13.3867
427	4.27	13.3936
428	4.28	13.4739
429	4.29	13.5397
430	4.3	13.3923
431	4.31	13.4051
432	4.32	13.3604
433	4.33	13.2407
434	4.34	13.1995
435	4.35	12.9855
436	4.36	13.5334
437	4.37	13.7717
438	4.38	13.652
439	4.39	13.8539
440	4.4	14.1227
441	4.41	13.9238
442	4.42	14.0022
443	4.43	14.181
444	4.44	13.9858
445	4.45	13.8704
446	4.46	13.954
447	4.47	13.7987
448	4.48	13.6137
449	4.49	13.7604
450	4.5	13.9628
451	4.51	13.9068
452	4.52	14.1801
453	4.53	14.2258
454	4.54	14.3052
455	4.55	14.2887
456	4.56	14.4507
457	4.57	14.3122
458	4.58	14.6008
459	4.59	14.9091
460	4.6	14.4637
461	4.61	14.1135
462	4.62	14.2316
463	4.63	14.1416
464	4.64	14.1858
465	4.65	14.2909
466	4.66	14.3801
467	4.67	14.1477
468	4.68	14.7929
469	4.69	14.5143
470	4.7	14.4248
471	4.71	14.311
472	4.72	14.6933
473	4.73	14.3521
474	4.74	14.4788
475	4.75	14.8938
476	4.76	14.7621
477	4.77	14.4421
478	4.78	14.6883
479	4.79	14.8474
480	4.8	15.2634
481	4.81	15.3949
482	4.82	15.6579
483	4.83	15.4128
484	4.84	15.5552
485	4.85	15.4969
486	4.86	15.3322
487	4.87	15.436
488	4.88	15.1715
489	4.89	14.6974
490	4.9	14.7803
491	4.91	14.9155
492	4.92	14.5926
493	4.93	14.7385
494	4.94	14.257
495	4.95	14.0167
496	4.96	13.8237
497	4.97	13.6894
498	4.98	13.5074
499	4.99	13.6403
500	5	13.5554
501	5.01	13.4141
502	5.02	13.3581
503	5.03	13.9066
504	5.04	13.5496
505	5.05	13.5085
506	5.06	13.3787
507	5.07	13.1499
508	5.08	13.15
509	5.09	13.2966
510	5.1	13.7057
511	5.11	13.8412
512	5.12	13.577
513	5.13	13.5923
514	5.14	13.3639
515	5.15	13.3834
516	5.16	13.9557
517	5.17	14.0154
518	5.18	14.2238
519	5.19	14.2728
520	5.2	14.316
521	5.21	14.281
522	5.22	14.563
523	5.23	14.7463
524	5.24	15.0418
525	5.25	15.1342
526	5.26	15.0016
527	5.27	14.8315
528	5.28	15.4252
529	5.29	15.4554
530	5.3	15.3365
531	5.31	15.4493
532	5.32	15.3037
533	5.33	15.2691
534	5.34	15.0983
535	5.35	15.4029
536	5.36	15.0506
537	5.37	15.3228
538	5.38	15.0275
539	5.39	15.2019
540	5.4	15.1126
541	5.41	14.9953
542	5.42	15.1479
543	5.43	15.3638
544	5.44	15.167
545	5.45	15.0077
546	5.46	14.9627
547	5.47	14.6541
548	5.48	14.7355
549	5.49	14.6335
550	5.5	14.4979
551	5.51	14.7941
552	5.52	14.6993
553	5.53	14.7657
554	5.54	15.3038
555	5.55	15.1169
556	5.56	15.0835
557	5.57	15.0015
558	5.58	14.9491
559	5.59	15.0057
560	5.6	15.2517
561	5.61	15.0804
562	5.62	15.0299
563	5.63	15.2143
564	5.64	15.455
565	5.65	15.7027
566	5.66	15.7095
567	5.67	15.8863
568	5.68	16.0501
569	5.69	16.0306
570	5.7	16.1813
571	5.71	16.1631
572	5.72	15.6781
573	5.73	15.6804
574	5.74	15.5965
575	5.75	15.762
576	5.76	16.0966
577	5.77	15.838
578	5.78	15.9173
579	5.79	15.9188
580	5.8	15.639
581	5.81	15.6715
582	5.82	15.5556
583	5.83	15.5596
584	5.84	15.4567
585	5.85	15.5718
586	5.86	16.0256
587	5.87	16.4183
588	5.88	16.5644
589	5.89	16.3182
590	5.9	16.235
591	5.91	16.0088
592	5.92	15.8812
593	5.93	16.2473
594	5.94	15.8775
595	5.95	15.9699
596	5.96	16.0605
597	5.97	15.782
598	5.98	15.9803
599	5.99	15.7172
600	6	16.0475
601	6.01	16.1719
602	6.02	16.4964
603	6.03	16.1722
604	6.04	16.4819
605	6.05	16.515
606	6.06	16.1761
607	6.07	15.9497
608	6.08	15.9835
609	6.09	16.2121
610	6.1	16.2438
611	6.11	16.3987
612	6.12	16.3869
613	6.13	16.6684
614	6.14	17.2532
615	6.15	17.196
616	6.16	17.2239
617	6.17	17.4556
618	6.18	17.863
619	6.19	17.844
620	6.2	17.8514
621	6.21	17.8805
622	6.22	17.8755
623	6.23	17.7412
624	6.24	17.7
625	6.25	18.0321
626	6.26	18.0342
627	6.27	17.9906
628	6.28	18.1485
629	6.29	18.8021
630	6.3	18.7974
631	6.31	19.0494
632	6.32	19.1563
633	6.33	18.8978
634	6.34	19.0392
635	6.35	18.8741
636	6.36	18.7601
637	6.37	18.8771
638	6.38	18.9159
639	6.39	19.2268
640	6.4	19.3248
641	6.41	19.5788
642	6.42	19.8328
643	6.43	20.2275
644	6.44	20.1757
645	6.45	20.3987
646	6.46	20.2953
647	6.47	20.3231
648	6.48	20.2617
649	6.49	20.3771
650	6.5	20.5859
651	6.51	20.4818
652	6.52	20.4125
653	6.53	20.5749
654	6.54	20.3453
655	6.55	20.5576
656	6.56	20.3828
657	6.57	20.2837
658	6.58	20.4596
659	6.59	20.4837
660	6.6	20.1989
661	6.61	19.9424
662	6.62	19.9209
663	6.63	19.7246
664	6.64	19.6309
665	6.65	19.9495
666	6.66	19.9779
667	6.67	19.5248
668	6.68	19.1363
669	6.69	19.4637
670	6.7	19.4889
671	6.71	19.8584
672	6.72	20.2465
673	6.73	20.2591
674	6.74	20.7711
675	6.75	21.2318
676	6.76	21.3066
677	6.77	21.0461
678	6.78	20.8187
679	6.79	20.4983
680	6.8	20.2914
681	6.81	20.5692
682	6.82	20.7981
683	6.83	20.5837
684	6.84	20.5288
685	6.85	20.3255
686	6.86	20.337
687	6.87	20.0005
688	6.88	20.3957
689	6.89	20.4352
690	6.9	20.2253
691	6.91	19.9447
692	6.92	19.8334
693	6.93	19.8662
694	6.94	20.1805
695	6.95	20.1662
696	6.96	20.0463
697	6.97	20.0209
698	6.98	20.1412
699	6.99	20.537
700	7	20.857
701	7.01	21.2107
702	7.02	21.287
703	7.03	21.6802
704	7.04	21.4604
705	7.05	21.389
706	7.06	21.1564
707	7.07	21.0557
708	7.08	21.0243
709	7.09	21.2153
710	7.1	20.9699
711	7.11	20.981
712	7.12	20.978
713	7.13	20.8067
714	7.14	20.8406
715	7.15	20.7572
716	7.16	20.6801
717	7.17	20.7308
718	7.18	20.7681
719	7.19	20.5332
720	7.2	20.5168
721	7.21	20.6206
722	7.22	20.7096
723	7.23	20.8432
724	7.24	20.7273
725	7.25	20.3842
726	7.26	20.8424
727	7.27	20.4503
728	7.28	20.6736
729	7.29	20.6795
730	7.3	20.6622
731	7.31	20.4661
732	7.32	20.6504
733	7.33	20.297
734	7.34	20.134
735	7.35	20.3994
736	7.36	20.4442
737	7.37	20.4462
738	7.38	20.3839
739	7.39	20.3314
740	7.4	20.5662
741	7.41	20.0488
742	7.42	20.0722
743	7.43	20.2328
744	7.44	20.1403
745	7.45	20.0801
746	7.46	20.4851
747	7.47	20.0948
748	7.48	20.382
749	7.49	20.1989
750	7.5	19.9548
751	7.51	20.2508
752	7.52	20.6384
753	7.53	20.434
754	7.54	20.3687
755	7.55	20.1923
756	7.56	20.0895
757	7.57	19.8739
758	7.58	19.7894
759	7.59	19.5736
760	7.6	19.6626
761	7.61	19.6074
762	7.62	19.5947
763	7.63	19.7917
764	7.64	19.8881
765	7.65	20.0401
766	7.66	19.9241
767	7.67	19.8751
768	7.68	19.9338
769	7.69	20.2596
770	7.7	20.0996
771	7.71	20.1473
772	7.72	20.2442
773	7.73	20.2417
774	7.74	19.895
775	7.75	20.0679
776	7.76	19.6586
777	7.77	19.7915
778	7.78	19.7573
779	7.79	19.9669
780	7.8	20.0796
781	7.81	20.1322
782	7.82	20.1532
783	7.83	19.6788
784	7.84	19.6567
785	7.85	19.3678
786	7.86	19.0862
787	7.87	19.16
788	7.88	18.9542
789	7.89	19.18
790	7.9	19.3005
791	7.91	19.7339
792	7.92	19.7101
793	7.93	19.6945
794	7.94	19.9494
795	7.95	19.8704
796	7.96	19.812
797	7.97	19.8932
798	7.98	19.9628
799	7.99	20.2621
800	8	20.0848
801	8.01	19.8043
802	8.02	19.8799
803	8.03	19.8712
804	8.04	19.8028
805	8.05	19.5791
806	8.06	19.4713
807	8.07	19.5689
808	8.08	19.8497
809	8.09	19.6731
810	8.1	19.7091
811	8.11	19.5701
812	8.12	19.839
813	8.13	20.1351
814	8.14	20.2301
815	8.15	20.3209
816	8.16	19.9273
817	8.17	20.0962
818	8.18	19.776
819	8.19	20.2179
820	8.2	20.4046
821	8.21	20.8058
822	8.22	21.3082
823	8.23	21.2247
824	8.24	21.0412
825	8.25	21.0876
826	8.26	20.945
827	8.27	20.8173
828	8.28	20.6269
829	8.29	20.1944
830	8.3	20.1991
831	8.31	20.0038
832	8.32	20.0135
833	8.33	19.8202
834	8.34	20.0806
835	8.35	20.3476
836	8.36	20.274
837	8.37	20.7797
838	8.38	20.7499
839	8.39	20.7491
840	8.4	20.8572
841	8.41	20.8025
842	8.42	21.009
843	8.43	21.3651
844	8.44	21.2154
845	8.45	21.4112
846	8.46	21.421
847	8.47	20.8987
848	8.48	20.9198
849	8.49	20.9805
850	8.5	21.2678
851	8.51	21.5289
852	8.52	21.4345
853	8.53	21.4072
854	8.54	21.2788
855	8.55	21.2208
856	8.56	21.11
857	8.57	21.4382
858	8.58	21.3547
859	8.59	21.3316
860	8.6	21.2235
861	8.61	21.3145
862	8.62	21.4842
863	8.63	21.6357
864	8.64	21.8416
865	8.65	21.5922
866	8.66	21.6141
867	8.67	21.5058
868	8.68	21.0329
869	8.69	20.9202
870	8.7	20.6844
871	8.71	20.752
872	8.72	20.3599
873	8.73	20.5236
874	8.74	20.3901
875	8.75	20.6117
876	8.76	20.6505
877	8.77	21.0822
878	8.78	20.8795
879	8.79	21.0393
880	8.8	21.1649
881	8.81	21.4221
882	8.82	21.2676
883	8.83	21.0749
884	8.84	20.8967
885	8.85	20.8997
886	8.86	20.7912
887	8.87	21.3156
888	8.88	21.3003
889	8.89	21.3876
890	8.9	21.3303
891	8.91	21.5214
892	8.92	21.7868
893	8.93	21.9061
894	8.94	22.1119
895	8.95	22.2871
896	8.96	22.3273
897	8.97	22.2496
898	8.98	22.1094
899	8.99	21.8629
900	9	21.5877
901	9.01	21.8159
902	9.02	21.5129
903	9.03	21.1503
904	9.04	21.3352
905	9.05	21.4106
906	9.06	21.0706
907	9.07	21.1299
908	9.08	21.445
909	9.09	21.7289
910	9.1	21.7172
911	9.11	21.4229
912	9.12	21.1955
913	9.13	21.4086
914	9.14	21.4475
915	9.15	21.6309
916	9.16	21.6558
917	9.17	21.7706
918	9.18	21.8144
919	9.19	21.5436
920	9.2	21.5758
921	9.21	21.7565
922	9.22	21.9978
923	9.23	22.1763
924	9.24	22.6572
925	9.25	22.7255
926	9.26	22.396
927	9.27	22.1898
928	9.28	22.194
929	9.29	22.297
930	9.3	21.6819
931	9.31	22.0963
932	9.32	21.9402
933	9.33	21.5609
934	9.34	21.5105
935	9.35	21.2176
936	9.36	21.1795
937	9.37	21.2386
938	9.38	21.4307
939	9.39	21.2428
940	9.4	21.4833
941	9.41	21.1168
942	9.42	21.0759
943	9.43	20.772
944	9.44	20.8231
945	9.45	20.6789
946	9.46	20.9199
947	9.47	20.9627
948	9.48	20.6957
949	9.49	20.612
950	9.5	20.781
951	9.51	20.5916
952	9.52	20.9257
953	9.53	21.1871
954	9.54	21.5422
955	9.55	21.2473
956	9.56	21.2848
957	9.57	21.4656
958	9.58	21.4674
959	9.59	21.3919
960	9.6	21.4578
961	9.61	21.6516
962	9.62	21.7315
963	9.63	21.6397
964	9.64	21.4445
965	9.65	21.6731
966	9.66	21.633
967	9.67	22.1517
968	9.68	21.9363
969	9.69	22.011
970	9.7	22.0857
971	9.71	22.0113
972	9.72	21.7963
973	9.73	22.0631
974	9.74	22.2108
975	9.75	22.4982
976	9.76	22.6049
977	9.77	22.4743
978	9.78	22.7415
979	9.79	22.2674
980	9.8	22.0231
981	9.81	21.9652
982	9.82	22.045
983	9.83	21.9412
984	9.84	21.9807
985	9.85	21.8848
986	9.86	22.0543
987	9.87	22.3888
988	9.88	22.7665
989	9.89	22.9136
990	9.9	23.2268
991	9.91	23.314
992	9.92	22.8911
993	9.93	22.9193
994	9.94	22.8252
995	9.95	22.9274
996	9.96	22.713
997	9.97	22.7635
998	9.98	23.2865
999	9.99	23.1394
1000	10	22.8837
1001	10.01	23.129
1002	10.02	23.047
1003	10.03	22.6772
1004	10.04	22.6059
1005	10.05	22.6602
1006	10.06	22.6312
1007	10.07	22.6664
1008	10.08	22.4348
1009	10.09	22.5111
1010	10.1	22.6612
1011	10.11	22.7791
1012	10.12	22.8504
1013	10.13	23.1995
1014	10.14	23.0835
1015	10.15	22.8446
1016	10.16	23.0746
1017	10.17	22.9706
1018	10.18	22.7364
1019	10.19	22.4148
1020	10.2	22.7844
1021	10.21	23.0551
1022	10.22	23.066
1023	10.23	23.2508
1024	10.24	23.3578
1025	10.25	23.2303
1026	10.26	23.2743
1027	10.27	23.0646
1028	10.28	23.0064
1029	10.29	22.9285
1030	10.3	23.2591
1031	10.31	23.325
1032	10.32	23.0096
1033	10.33	22.961
1034	10.34	22.918
1035	10.35	22.9777
1036	10.36	22.8876
1037	10.37	22.9765
1038	10.38	23.071
1039	10.39	23.3973
1040	10.4	23.8124
1041	10.41	23.9797
1042	10.42	24.0546
1043	10.43	24.3178
1044	10.44	24.2383
1045	10.45	24.2195
1046	10.46	23.6637
1047	10.47	23.2353
1048	10.48	23.6591
1049	10.49	23.7624
1050	10.5	23.8006
1051	10.51	23.6456
1052	10.52	23.612
1053	10.53	23.7959
1054	10.54	23.9688
1055	10.55	23.795
1056	10.56	24.0006
1057	10.57	24.2043
1058	10.58	23.9485
1059	10.59	24.0194
1060	10.6	24.201
1061	10.61	24.3895
1062	10.62	24.3773
1063	10.63	24.3837
1064	10.64	24.0335
1065	10.65	24.1112
1066	10.66	23.8631
1067	10.67	23.7288
1068	10.68	24.074
1069	10.69	24.3347
1070	10.7	24.4994
1071	10.71	24.3859
1072	10.72	24.4043
1073	10.73	24.6794
1074	10.74	25.1075
1075	10.75	25.4857
1076	10.76	25.8774
1077	10.77	26.2401
1078	10.78	25.9576
1079	10.79	25.7989
1080	10.8	25.9454
1081	10.81	26.2014
1082	10.82	26.2102
1083	10.83	25.9374
1084	10.84	25.9836
1085	10.85	26.1697
1086	10.86	26.466
1087	10.87	26.492
1088	10.88	26.5461
1089	10.89	26.4818
1090	10.9	26.5355
1091	10.91	26.3982
1092	10.92	26.6301
1093	10.93	26.3645
1094	10.94	26.3225
1095	10.95	25.8532
1096	10.96	25.9076
1097	10.97	25.9243
1098	10.98	26.1743
1099	10.99	26.0858
1100	11	26.4733
1101	11.01	26.7682
1102	11.02	26.7479
1103	11.03	26.5551
1104	11.04	26.4653
1105	11.05	26.6107
1106	11.06	27.0188
1107	11.07	27.143
1108	11.08	27.0897
1109	11.09	26.7969
1110	11.1	26.6927
1111	11.11	26.7669
1112	11.12	26.9377
1113	11.13	26.9939
1114	11.14	26.9107
1115	11.15	26.9746
1116	11.16	26.9799
1117	11.17	27.1119
1118	11.18	27.3759
1119	11.19	27.6326
1120	11.2	27.6232
1121	11.21	27.6808
1122	11.22	27.4647
1123	11.23	27.2042
1124	11.24	27.1677
1125	11.25	27.209
1126	11.26	27.389
1127	11.27	27.5829
1128	11.28	27.3588
1129	11.29	27.6033
1130	11.3	27.5412
1131	11.31	27.5047
1132	11.32	27.6198
1133	11.33	27.9146
1134	11.34	27.546
1135	11.35	27.7495
1136	11.36	27.5162
1137	11.37	27.2911
1138	11.38	27.4514
1139	11.39	27.3752
1140	11.4	27.0427
1141	11.41	26.8676
1142	11.42	27.1634
1143	11.43	27.2913
1144	11.44	27.4623
1145	11.45	26.8524
1146	11.46	26.7604
1147	11.47	27.1798
1148	11.48	27.1057
1149	11.49	27.3536
1150	11.5	27.712
1151	11.51	27.0494
1152	11.52	27.0408
1153	11.53	27.0123
1154	11.54	27.5972
1155	11.55	27.4647
1156	11.56	27.488
1157	11.57	27.426
1158	11.58	27.359
1159	11.59	27.3801
1160	11.6	27.0621
1161	11.61	27.3044
1162	11.62	27.576
1163	11.63	27.3865
1164	11.64	27.0165
1165	11.65	27.2568
1166	11.66	27.1346
1167	11.67	27.3406
1168	11.68	27.5441
1169	11.69	27.2756
1170	11.7	27.335
1171	11.71	26.9989
1172	11.72	26.6078
1173	11.73	26.6587
1174	11.74	26.759
1175	11.75	26.6477
1176	11.76	26.1824
1177	11.77	25.7509
1178	11.78	25.8737
1179	11.79	26.3966
1180	11.8	26.2731
1181	11.81	25.8578
1182	11.82	26.0941
1183	11.83	25.8297
1184	11.84	26.1941
1185	11.85	26.3127
1186	11.86	26.1417
1187	11.87	26.2278
1188	11.88	26.3159
1189	11.89	26.315
1190	11.9	26.1924
1191	11.91	26.4315
1192	11.92	26.1738
1193	11.93	26.3645
1194	11.94	26.578
1195	11.95	26.5852
1196	11.96	26.2952
1197	11.97	26.5033
1198	11.98	26.6959
1199	11.99	26.777
1200	12	26.8963
1201	12.01	27.208
1202	12.02	27.6361
1203	12.03	27.9138
1204	12.04	28.0746
1205	12.05	27.9404
1206	12.06	28.0255
1207	12.07	28.0312
1208	12.08	27.9968
1209	12.09	28.0482
1210	12.1	28.1368
1211	12.11	28.3181
1212	12.12	28.1299
1213	12.13	28.0005
1214	12.14	28.443
1215	12.15	28.4503
1216	12.16	28.3009
1217	12.17	28.2248
1218	12.18	28.3366
1219	12.19	28.4574
1220	12.2	28.4667
1221	12.21	28.3954
1222	12.22	28.0889
1223	12.23	28.0369
1224	12.24	27.991
1225	12.25	27.8123
1226	12.26	27.5479
1227	12.27	27.653
1228	12.28	27.8082
1229	12.29	27.6957
1230	12.3	27.5844
1231	12.31	27.9498
1232	12.32	27.7354
1233	12.33	27.6741
1234	12.34	27.9055
1235	12.35	27.7797
1236	12.36	27.8213
1237	12.37	27.5435
1238	12.38	27.5582
1239	12.39	27.6534
1240	12.4	27.7504
1241	12.41	27.8458
1242	12.42	27.911
1243	12.43	27.8744
1244	12.44	27.6563
1245	12.45	27.6219
1246	12.46	27.6372
1247	12.47	27.6709
1248	12.48	27.5038
1249	12.49	27.9302
1250	12.5	27.6019
1251	12.51	27.529
1252	12.52	27.204
1253	12.53	27.1248
1254	12.54	26.8633
1255	12.55	26.984
1256	12.56	26.9079
1257	12.57	26.9595
1258	12.58	27.2823
1259	12.59	27.2881
1260	12.6	27.2234
1261	12.61	27.2528
1262	12.62	27.3178
1263	12.63	27.3865
1264	12.64	27.4021
1265	12.65	27.5802
1266	12.66	27.7178
1267	12.67	27.7016
1268	12.68	27.5528
1269	12.69	27.2549
1270	12.7	27.2527
1271	12.71	27.4693
1272	12.72	27.2524
1273	12.73	27.4693
1274	12.74	27.4018
1275	12.75	27.4015
1276	12.76	27.3414
1277	12.77	27.2459
1278	12.78	27.286
1279	12.79	27.0242
1280	12.8	27.4842
1281	12.81	27.6789
1282	12.82	27.6579
1283	12.83	27.7197
1284	12.84	27.6034
1285	12.85	27.1712
1286	12.86	27.2472
1287	12.87	27.4378
1288	12.88	27.5627
1289	12.89	27.4879
1290	12.9	27.6005
1291	12.91	27.6058
1292	12.92	27.199
1293	12.93	27.2902
1294	12.94	27.1056
1295	12.95	27.25
1296	12.96	27.0666
1297	12.97	26.8155
1298	12.98	27.0963
1299	12.99	27.0129
1300	13	26.8903
1301	13.01	26.6874
1302	13.02	26.6174
1303	13.03	26.5318
1304	13.04	26.7641
1305	13.05	26.8964
1306	13.06	27.139
1307	13.07	26.892
1308	13.08	27.0301
1309	13.09	27.101
1310	13.1	26.8322
1311	13.11	27.1002
1312	13.12	27.1031
1313	13.13	27.2766
1314	13.14	27.301
1315	13.15	26.7619
1316	13.16	26.7158
1317	13.17	26.8709
1318	13.18	26.8677
1319	13.19	26.9764
1320	13.2	26.8877
1321	13.21	26.8972
1322	13.22	26.8845
1323	13.23	27.0173
1324	13.24	26.9793
1325	13.25	27.0328
1326	13.26	27.0262
1327	13.27	26.6289
1328	13.28	26.4614
1329	13.29	26.4783
1330	13.3	26.2768
1331	13.31	26.1181
1332	13.32	26.1364
1333	13.33	26.294
1334	13.34	26.1133
1335	13.35	26.0333
1336	13.36	25.9187
1337	13.37	25.8947
1338	13.38	25.9024
1339	13.39	26.2007
1340	13.4	26.1767
1341	13.41	26.0265
1342	13.42	26.0438
1343	13.43	26.1496
1344	13.44	26.0872
1345	13.45	25.9019
1346	13.46	25.9873
1347	13.47	26.1071
1348	13.48	26.0694
1349	13.49	25.9708
1350	13.5	26.1084
1351	13.51	26.0871
1352	13.52	25.6536
1353	13.53	25.5865
1354	13.54	25.4395
1355	13.55	25.2043
1356	13.56	25.3132
1357	13.57	25.4045
1358	13.58	25.3845
1359	13.59	25.4381
1360	13.6	25.7684
1361	13.61	25.9867
1362	13.62	26.248
1363	13.63	26.2017
1364	13.64	26.2124
1365	13.65	25.9547
1366	13.66	25.9316
1367	13.67	25.9687
1368	13.68	25.9796
1369	13.69	26.1736
1370	13.7	26.2754
1371	13.71	26.276
1372	13.72	26.5342
1373	13.73	26.5013
1374	13.74	26.3883
1375	13.75	26.4722
1376	13.76	26.3438
1377	13.77	26.2934
1378	13.78	26.181
1379	13.79	26.0542
1380	13.8	26.2095
1381	13.81	25.9242
1382	13.82	25.7339
1383	13.83	25.6202
1384	13.84	25.7336
1385	13.85	25.7992
1386	13.86	26.0803
1387	13.87	26.2052
1388	13.88	26.0124
1389	13.89	25.7905
1390	13.9	26.0898
1391	13.91	26.2951
1392	13.92	26.5162
1393	13.93	26.3732
1394	13.94	26.5527
1395	13.95	26.4202
1396	13.96	26.4052
1397	13.97	26.5549
1398	13.98	26.5661
1399	13.99	26.5927
1400	14	26.4852
1401	14.01	26.4613
1402	14.02	26.5605
1403	14.03	26.5935
1404	14.04	26.6986
1405	14.05	26.2026
1406	14.06	26.2797
1407	14.07	26.497
1408	14.08	26.3701
1409	14.09	26.3428
1410	14.1	26.2939
1411	14.11	26.3451
1412	14.12	26.511
1413	14.13	26.3696
1414	14.14	26.5249
1415	14.15	26.9744
1416	14.16	27.0702
1417	14.17	27.0357
1418	14.18	26.9152
1419	14.19	27.3432
1420	14.2	27.2799
1421	14.21	27.631
1422	14.22	27.163
1423	14.23	27.4008
1424	14.24	27.4116
1425	14.25	27.6334
1426	14.26	27.3675
1427	14.27	27.4834
1428	14.28	27.2273
1429	14.29	27.1372
1430	14.3	26.8093
1431	14.31	26.4049
1432	14.32	26.5401
1433	14.33	26.4319
1434	14.34	26.7427
1435	14.35	26.6814
1436	14.36	26.8369
1437	14.37	26.7809
1438	14.38	27.0559
1439	14.39	26.9181
1440	14.4	26.9571
1441	14.41	26.9281
1442	14.42	26.8513
1443	14.43	26.8138
1444	14.44	26.7907
1445	14.45	26.5999
1446	14.46	26.6398
1447	14.47	26.7976
1448	14.48	26.5877
1449	14.49	26.4821
1450	14.5	26.4057
1451	14.51	26.741
1452	14.52	26.744
1453	14.53	26.6864
1454	14.54	26.6018
1455	14.55	26.602
1456	14.56	26.5299
1457	14.57	26.739
1458	14.58	26.4933
1459	14.59	26.3845
1460	14.6	26.4607
1461	14.61	26.2255
1462	14.62	26.1335
1463	14.63	26.1288
1464	14.64	26.0479
1465	14.65	26.0463
1466	14.66	26.0223
1467	14.67	26.4178
1468	14.68	26.4896
1469	14.69	26.3833
1470	14.7	26.0265
1471	14.71	26.0054
1472	14.72	25.8717
1473	14.73	25.7968
1474	14.74	25.8661
1475	14.75	25.904
1476	14.76	26.1432
1477	14.77	26.1602
1478	14.78	26.3084
1479	14.79	26.1463
1480	14.8	26.5774
1481	14.81	26.3382
1482	14.82	26.1093
1483	14.83	26.1118
1484	14.84	26.3129
1485	14.85	26.5466
1486	14.86	26.4067
1487	14.87	26.5932
1488	14.88	26.8853
1489	14.89	27.0297
1490	14.9	26.8134
1491	14.91	26.8299
1492	14.92	26.9521
1493	14.93	26.8401
1494	14.94	26.6623
1495	14.95	26.6779
1496	14.96	26.4843
1497	14.97	26.4032
1498	14.98	26.2772
1499	14.99	26.3674
1500	15	25.8972
1501	15.01	25.7146
1502	15.02	25.8578
1503	15.03	25.8106
1504	15.04	25.7958
1505	15.05	25.7117
1506	15.06	25.7083
1507	15.07	25.7899
1508	15.08	25.8057
1509	15.09	26.1422
1510	15.1	26.1011
1511	15.11	26.2192
1512	15.12	26.5184
1513	15.13	26.4384
1514	15.14	26.6399
1515	15.15	26.8214
1516	15.16	26.7086
1517	15.17	26.4812
1518	15.18	26.5579
1519	15.19	26.337
1520	15.2	26.3066
1521	15.21	26.2426
1522	15.22	26.4324
1523	15.23	26.4127
1524	15.24	26.188
1525	15.25	26.1308
1526	15.26	26.4804
1527	15.27	26.4989
1528	15.28	26.4349
1529	15.29	26.4443
1530	15.3	26.4379
1531	15.31	26.4707
1532	15.32	26.0956
1533	15.33	26.1884
1534	15.34	26.2604
1535	15.35	26.0206
1536	15.36	25.9346
1537	15.37	25.9903
1538	15.38	26.4506
1539	15.39	26.6838
1540	15.4	26.9581
1541	15.41	26.9888
1542	15.42	26.9426
1543	15.43	26.8083
1544	15.44	26.6924
1545	15.45	26.799
1546	15.46	27.0857
1547	15.47	27.5249
1548	15.48	27.5463
1549	15.49	27.2469
1550	15.5	27.5471
1551	15.51	27.5464
1552	15.52	27.4235
1553	15.53	27.3258
1554	15.54	27.1407
1555	15.55	27.21
1556	15.56	27.2046
1557	15.57	27.0304
1558	15.58	26.9215
1559	15.59	27.004
1560	15.6	27.2202
1561	15.61	27.3463
1562	15.62	27.3737
1563	15.63	27.6802
1564	15.64	27.538
1565	15.65	27.4053
1566	15.66	27.4377
1567	15.67	27.3785
1568	15.68	27.0962
1569	15.69	27.1472
1570	15.7	26.9292
1571	15.71	26.8888
1572	15.72	26.6227
1573	15.73	26.554
1574	15.74	26.5084
1575	15.75	26.4744
1576	15.76	26.5474
1577	15.77	26.363
1578	15.78	26.1912
1579	15.79	26.6595
1580	15.8	26.4307
1581	15.81	26.6645
1582	15.82	27.0559
1583	15.83	27.0314
1584	15.84	27.0453
1585	15.85	26.8551
1586	15.86	26.6895
1587	15.87	26.6611
1588	15.88	26.5027
1589	15.89	26.8283
1590	15.9	26.6948
1591	15.91	26.5025
1592	15.92	26.7208
1593	15.93	26.3363
1594	15.94	26.6203
1595	15.95	26.4018
1596	15.96	26.3861
1597	15.97	26.3254
1598	15.98	26.4375
1599	15.99	26.4273
1600	16	26.5524
1601	16.01	26.7377
1602	16.02	26.944
1603	16.03	27.0598
1604	16.04	26.9178
1605	16.05	27.1867
1606	16.06	27.01
1607	16.07	27.0154
1608	16.08	27.0228
1609	16.09	27.4134
1610	16.1	27.687
1611	16.11	28.0832
1612	16.12	28.1918
1613	16.13	28.2233
1614	16.14	28.1085
1615	16.15	28.4473
1616	16.16	28.4381
1617	16.17	28.243
1618	16.18	28.0746
1619	16.19	28.2409
1620	16.2	28.1959
1621	16.21	27.9895
1622	16.22	28.1143
1623	16.23	28.2002
1624	16.24	28.2483
1625	16.25	28.1036
1626	16.26	27.9485
1627	16.27	27.9416
1628	16.28	27.8716
1629	16.29	27.8228
1630	16.3	28.272
1631	16.31	28.3023
1632	16.32	28.3864
1633	16.33	28.3679
1634	16.34	28.5956
1635	16.35	28.7435
1636	16.36	28.8902
1637	16.37	29.0958
1638	16.38	29.4017
1639	16.39	29.0683
1640	16.4	29.1157
1641	16.41	28.8749
1642	16.42	28.6348
1643	16.43	28.7012
1644	16.44	28.858
1645	16.45	29.0508
1646	16.46	29.0843
1647	16.47	28.6548
1648	16.48	28.6549
1649	16.49	28.5045
1650	16.5	28.6582
1651	16.51	28.822
1652	16.52	28.6319
1653	16.53	28.9708
1654	16.54	29.457
1655	16.55	28.9829
1656	16.56	28.7769
1657	16.57	29.0396
1658	16.58	28.8668
1659	16.59	29.2749
1660	16.6	29.3157
1661	16.61	29.3951
1662	16.62	29.6025
1663	16.63	29.8105
1664	16.64	29.6747
1665	16.65	29.8004
1666	16.66	29.6924
1667	16.67	29.8855
1668	16.68	29.9795
1669	16.69	30.0497
1670	16.7	29.8447
1671	16.71	30.0187
1672	16.72	30.2072
1673	16.73	30.2168
1674	16.74	29.9014
1675	16.75	30.171
1676	16.76	30.5758
1677	16.77	30.5349
1678	16.78	30.4681
1679	16.79	30.591
1680	16.8	30.6781
1681	16.81	30.4816
1682	16.82	30.0768
1683	16.83	30.4778
1684	16.84	30.4299
1685	16.85	30.3648
1686	16.86	30.6479
1687	16.87	30.7135
1688	16.88	30.6759
1689	16.89	30.707
1690	16.9	30.6098
1691	16.91	30.4552
1692	16.92	30.1695
1693	16.93	30.2586
1694	16.94	30.2798
1695	16.95	30.4936
1696	16.96	30.8209
1697	16.97	30.6393
1698	16.98	30.7513
1699	16.99	30.7611
1700	17	30.73
1701	17.01	30.7461
1702	17.02	30.5631
1703	17.03	30.696
1704	17.04	30.7777
1705	17.05	30.8418
1706	17.06	30.5935
1707	17.07	30.8509
1708	17.08	30.743
1709	17.09	30.6442
1710	17.1	30.6574
1711	17.11	30.7158
1712	17.12	30.737
1713	17.13	30.8183
1714	17.14	30.7702
1715	17.15	30.7958
1716	17.16	30.7854
1717	17.17	30.7814
1718	17.18	30.8361
1719	17.19	31.038
1720	17.2	30.9504
1721	17.21	30.9331
1722	17.22	31.0443
1723	17.23	31.0186
1724	17.24	30.7966
1725	17.25	30.7596
1726	17.26	30.8617
1727	17.27	30.7922
1728	17.28	30.808
1729	17.29	30.9295
1730	17.3	30.7942
1731	17.31	31.0105
1732	17.32	30.8849
1733	17.33	30.4553
1734	17.34	30.2004
1735	17.35	30.2826
1736	17.36	30.1825
1737	17.37	29.8948
1738	17.38	29.9419
1739	17.39	29.7292
1740	17.4	29.6714
1741	17.41	29.8448
1742	17.42	29.558
1743	17.43	29.8364
1744	17.44	30.1988
1745	17.45	30.3309
1746	17.46	30.3053
1747	17.47	30.4843
1748	17.48	30.2932
1749	17.49	30.0102
1750	17.5	30.0954
1751	17.51	30.1125
1752	17.52	29.8866
1753	17.53	29.9643
1754	17.54	30.2012
1755	17.55	30.1878
1756	17.56	29.868
1757	17.57	29.4854
1758	17.58	29.181
1759	17.59	29.1373
1760	17.6	29.3442
1761	17.61	29.2547
1762	17.62	29.5814
1763	17.63	29.5144
1764	17.64	29.5301
1765	17.65	29.5978
1766	17.66	29.5119
1767	17.67	29.1586
1768	17.68	29.3739
1769	17.69	29.487
1770	17.7	29.2365
1771	17.71	29.083
1772	17.72	29.0609
1773	17.73	28.8254
1774	17.74	28.737
1775	17.75	28.4739
1776	17.76	28.1561
1777	17.77	28.4044
1778	17.78	28.3137
1779	17.79	28.4913
1780	17.8	28.6202
1781	17.81	28.2986
1782	17.82	28.5087
1783	17.83	28.3375
1784	17.84	28.4478
1785	17.85	28.3468
1786	17.86	28.3318
1787	17.87	28.5331
1788	17.88	28.8083
1789	17.89	28.5063
1790	17.9	28.7011
1791	17.91	28.6352
1792	17.92	28.6881
1793	17.93	28.6781
1794	17.94	28.463
1795	17.95	28.5055
1796	17.96	28.7009
1797	17.97	28.5405
1798	17.98	28.516
1799	17.99	28.718
1800	18	28.9485
1801	18.01	28.7405
1802	18.02	28.885
1803	18.03	29.0574
1804	18.04	29.1775
1805	18.05	29.3773
1806	18.06	29.5099
1807	18.07	29.644
1808	18.08	29.5935
1809	18.09	29.6401
1810	18.1	29.5156
1811	18.11	29.7382
1812	18.12	29.3178
1813	18.13	29.3621
1814	18.14	29.4137
1815	18.15	29.2848
1816	18.16	29.3521
1817	18.17	29.2221
1818	18.18	29.0717
1819	18.19	29.0935
1820	18.2	29.3334
1821	18.21	29.331
1822	18.22	29.2919
1823	18.23	28.8559
1824	18.24	29.1819
1825	18.25	29.4008
1826	18.26	29.3568
1827	18.27	29.2333
1828	18.28	29.2278
1829	18.29	29.6247
1830	18.3	29.8127
1831	18.31	29.6723
1832	18.32	29.5556
1833	18.33	29.5662
1834	18.34	29.6595
1835	18.35	29.4239
1836	18.36	29.327
1837	18.37	29.3884
1838	18.38	29.6099
1839	18.39	29.5146
1840	18.4	29.7268
1841	18.41	29.5482
1842	18.42	29.6625
1843	18.43	29.8021
1844	18.44	29.5571
1845	18.45	29.4902
1846	18.46	29.3367
1847	18.47	29.5613
1848	18.48	29.3699
1849	18.49	29.1664
1850	18.5	29.0147
1851	18.51	28.9634
1852	18.52	29.1205
1853	18.53	29.1759
1854	18.54	29.1671
1855	18.55	29.5624
1856	18.56	29.5099
1857	18.57	29.6328
1858	18.58	29.7914
1859	18.59	29.6305
1860	18.6	29.6016
1861	18.61	29.7886
1862	18.62	29.6624
1863	18.63	29.7258
1864	18.64	29.7781
1865	18.65	29.7152
1866	18.66	29.6959
1867	18.67	29.7412
1868	18.68	30.003
1869	18.69	29.9122
1870	18.7	30.074
1871	18.71	29.967
1872	18.72	29.8912
1873	18.73	29.7809
1874	18.74	30.2076
1875	18.75	29.9283
1876	18.76	30.0387
1877	18.77	29.8236
1878	18.78	29.7965
1879	18.79	30.0113
1880	18.8	30.0213
1881	18.81	30.1468
1882	18.82	30.1268
1883	18.83	30.1535
1884	18.84	30.3348
1885	18.85	30.5553
1886	18.86	30.3361
1887	18.87	30.6647
1888	18.88	30.3233
1889	18.89	30.4334
1890	18.9	30.5999
1891	18.91	30.4117
1892	18.92	30.6112
1893	18.93	30.8496
1894	18.94	31.0173
1895	18.95	31.0904
1896	18.96	30.9035
1897	18.97	30.7782
1898	18.98	30.8158
1899	18.99	30.8249
1900	19	30.7887
1901	19.01	30.9911
1902	19.02	31.154
1903	19.03	30.9641
1904	19.04	30.73
1905	19.05	30.6257
1906	19.06	30.8796
1907	19.07	31.0279
1908	19.08	31.1505
1909	19.09	30.9977
1910	19.1	30.985
1911	19.11	31.0753
1912	19.12	30.9965
1913	19.13	30.9577
1914	19.14	30.6442
1915	19.15	30.4444
1916	19.16	30.8611
1917	19.17	30.9878
1918	19.18	31.2384
1919	19.19	31.2942
1920	19.2	31.5147
1921	19.21	31.451
1922	19.22	31.2795
1923	19.23	31.528
1924	19.24	31.891
1925	19.25	32.1153
1926	19.26	32.1591
1927	19.27	32.1888
1928	19.28	32.2245
1929	19.29	32.1045
1930	19.3	32.1655
1931	19.31	32.1134
1932	19.32	31.9763
1933	19.33	31.9231
1934	19.34	32.1006
1935	19.35	31.9335
1936	19.36	32.1097
1937	19.37	31.825
1938	19.38	32.3906
1939	19.39	32.3883
1940	19.4	32.2655
1941	19.41	32.2345
1942	19.42	32.2388
1943	19.43	31.9769
1944	19.44	31.9004
1945	19.45	32.1779
1946	19.46	31.7836
1947	19.47	31.6846
1948	19.48	31.8605
1949	19.49	31.702
1950	19.5	31.6125
1951	19.51	31.8337
1952	19.52	31.6662
1953	19.53	31.2988
1954	19.54	31.3689
1955	19.55	31.7343
1956	19.56	31.5517
1957	19.57	31.7696
1958	19.58	31.7271
1959	19.59	31.8994
1960	19.6	31.9928
1961	19.61	32.1017
1962	19.62	31.9705
1963	19.63	31.7565
1964	19.64	31.8991
1965	19.65	32.0326
1966	19.66	31.8652
1967	19.67	31.7551
1968	19.68	31.2541
1969	19.69	31.058
1970	19.7	31.162
1971	19.71	31.0425
1972	19.72	31.1595
1973	19.73	31.4606
1974	19.74	31.5386
1975	19.75	31.6598
1976	19.76	31.7034
1977	19.77	31.3842
1978	19.78	31.5175
1979	19.79	31.7129
1980	19.8	31.7567
1981	19.81	31.7517
1982	19.82	31.5899
1983	19.83	31.1483
1984	19.84	31.0539
1985	19.85	31.0964
1986	19.86	31.4855
1987	19.87	31.853
1988	19.88	31.7146
1989	19.89	31.6921
1990	19.9	32.074
1991	19.91	32.1429
1992	19.92	31.9937
1993	19.93	31.8625
1994	19.94	32.1725
1995	19.95	32.0748
1996	19.96	31.9684
1997	19.97	31.9169
1998	19.98	32.1894
[truncated: 18,002 more rows]
